# Supplementary material for: Depth-resolved X-ray absorption spectroscopic study on nanoscale observation of the electrode–solid electrolyte interface for all solid state lithium ion batteries
Source: Royal Society of Chemistry journal article supplement (doi:10.1039/c0jm04366d), 2011-01-01
Supplement: c0jm04366d.pdf [file c0jm04366d.pdf]

*Supporting Information*

**Depth-Resolved X-Ray Absorption Spectroscopic Study on Nanoscale Observation  
of Electrode / Solid Electrolyte Interface for All Solid State Lithium Ion Battery**

Toyoki Okumura<sup>a</sup>, Takayuki Nakatsutsumi<sup>a</sup>, Toshiaki Ina<sup>a</sup>, Yuki Orikasa<sup>b</sup>, Hajime Arai<sup>b</sup>, Tomokazu Fukutsuka<sup>c</sup>, Yasutoshi Iriyama<sup>d</sup>, Tomoya Uruga<sup>e</sup>, Hajime Tanida<sup>e</sup>, Yoshiharu Uchimoto<sup>a</sup>, Zempachi Ogumi<sup>b</sup>

<sup>a</sup> *Graduate School of Human and Environmental Studies, Kyoto University, Yoshida-nihonmatsu-cho, Sakyo-ku, Kyoto 606-8501, Japan,  
E-mail: t. okumura@ht3.ecs.kyoto-u.ac.jp*

<sup>b</sup> *Innovative Collaboration Center, Kyoto University, Yoshida-nihonmatsu-cho, Kyoto 606-8501, Japan*

<sup>c</sup> *Graduate School of Engineering, Kyoto University, Nishikyo-ku, Kyoto 615-8510, Japan*

<sup>d</sup> *Faculty of Engineering, Shizuoka University, 3-5-1 Johoku, Hamamatsu, Shizuoka 432-8561, Japan*

<sup>e</sup> *JASRI, 1-1-1 Kouto, Sayo-gun, Hyogo 679-5198, Japan*

**Table S1.** Working functions of LATP-GC substrate, LiCoO<sub>2</sub> film, and interlayer films observed from a photoelectron spectroscopy.

|                                                                  |                  | Work function / eV |
|------------------------------------------------------------------|------------------|--------------------|
| LiCoO <sub>2</sub>                                               |                  | 5.33               |
| Li <sub>1-x</sub> CoO <sub>2</sub><br>(deintercalated at 3.92 V) |                  | 5.39               |
| LATP-GC                                                          |                  | 5.00               |
| Interfacial layer                                                | MoO <sub>2</sub> | 5.00               |
|                                                                  | NbO <sub>2</sub> | 5.31               |
|                                                                  | ZrO <sub>2</sub> | 5.50               |

**Table S2.** Calculated parameters from Co K-edge EXAFS of LiCoO<sub>2</sub>/ L ATP-GC electrolyte and LiCoO<sub>2</sub>/ NbO<sub>2</sub>/ L ATP-GC electrolyte before charged at various channel of PILATUS detector.

| before deintercalation                         | Co-O |       |       | Co-Co |       |       | Residue(%) |
|------------------------------------------------|------|-------|-------|-------|-------|-------|------------|
|                                                | CN   | R/Å   | σ/Å   | CN    | R/Å   | σ/Å   |            |
| LiCoO <sub>2</sub> /L ATP-GC                   |      |       |       |       |       |       |            |
| 150                                            | 6    | 1.904 | 0.080 | 6     | 2.818 | 0.074 | 2.196      |
| 151                                            | 6    | 1.905 | 0.071 | 6     | 2.816 | 0.068 | 0.937      |
| 152                                            | 6    | 1.908 | 0.069 | 6     | 2.816 | 0.066 | 1.153      |
| 153                                            | 6    | 1.908 | 0.070 | 6     | 2.815 | 0.064 | 1.829      |
| 154                                            | 6    | 1.907 | 0.064 | 6     | 2.814 | 0.066 | 1.902      |
| LiCoO <sub>2</sub> /NbO <sub>2</sub> /L ATP-GC |      |       |       |       |       |       |            |
| 150                                            | 6    | 1.903 | 0.072 | 6     | 2.820 | 0.071 | 0.930      |
| 151                                            | 6    | 1.903 | 0.071 | 6     | 2.818 | 0.068 | 0.900      |
| 152                                            | 6    | 1.904 | 0.070 | 6     | 2.815 | 0.066 | 0.860      |
| 153                                            | 6    | 1.905 | 0.067 | 6     | 2.814 | 0.067 | 0.795      |
| 154                                            | 6    | 1.907 | 0.066 | 6     | 2.814 | 0.064 | 0.933      |

**Table S3.** Calculated parameters from Co K-edge EXAFS of LiCoO<sub>2</sub>/LATP-GC electrolyte and LiCoO<sub>2</sub>/NbO<sub>2</sub>/LATP-GC electrolyte after charged to 3.92 V measured at various channel of PILATUS detector.

| after deintercalation                         | Co-O |     |       | Co-Co |     |       | Residue(%) |       |
|-----------------------------------------------|------|-----|-------|-------|-----|-------|------------|-------|
|                                               | CN   | R/Å | σ/Å   | CN    | R/Å | σ/Å   |            |       |
| LiCoO <sub>2</sub> /LATP-GC                   |      |     |       |       |     |       |            |       |
|                                               | 150  | 6   | 1.891 | 0.075 | 6   | 2.824 | 0.075      | 2.204 |
|                                               | 151  | 6   | 1.889 | 0.075 | 6   | 2.822 | 0.072      | 1.709 |
|                                               | 152  | 6   | 1.889 | 0.076 | 6   | 2.822 | 0.072      | 1.394 |
|                                               | 153  | 6   | 1.888 | 0.073 | 6   | 2.819 | 0.072      | 1.684 |
|                                               | 154  | 6   | 1.890 | 0.075 | 6   | 2.821 | 0.073      | 1.308 |
| LiCoO <sub>2</sub> /NbO <sub>2</sub> /LATP-GC |      |     |       |       |     |       |            |       |
|                                               | 150  | 6   | 1.899 | 0.076 | 6   | 2.827 | 0.077      | 1.320 |
|                                               | 151  | 6   | 1.897 | 0.071 | 6   | 2.827 | 0.073      | 1.029 |
|                                               | 152  | 6   | 1.894 | 0.071 | 6   | 2.824 | 0.073      | 1.296 |
|                                               | 153  | 6   | 1.892 | 0.068 | 6   | 2.824 | 0.071      | 1.888 |
|                                               | 154  | 6   | 1.891 | 0.070 | 6   | 2.821 | 0.072      | 1.224 |

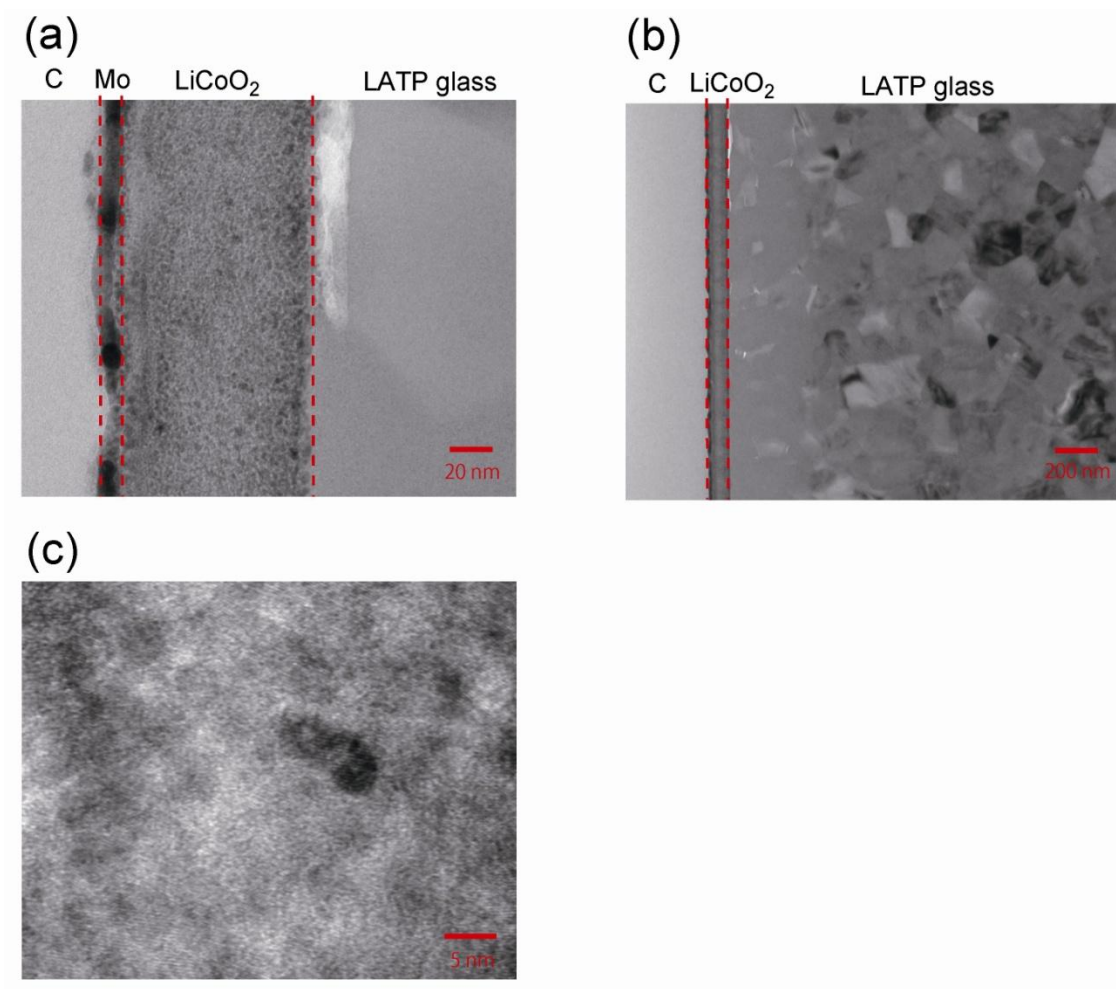

**Figure S1.** TEM images of the LiCoO<sub>2</sub> film /LATP glass electrolyte assemble.

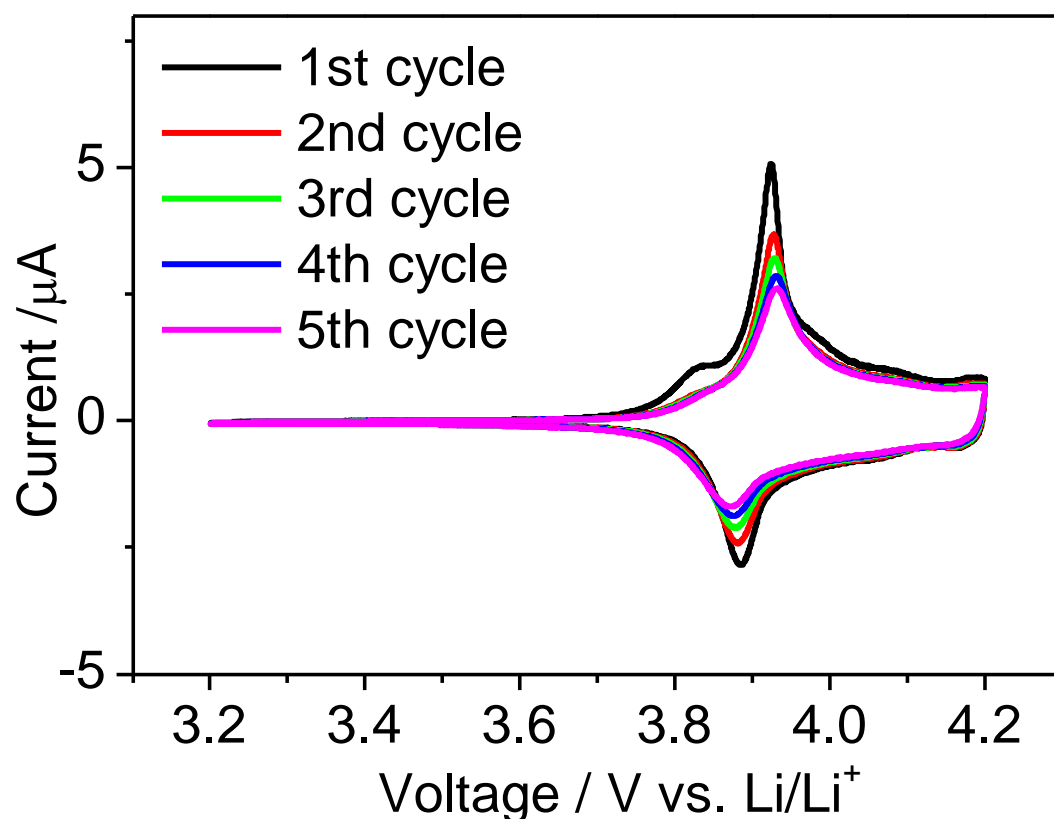

**Figure S2.** Cyclic voltammograms of the LiCoO<sub>2</sub> film /LATP glass electrolyte assemble;  $\nu = 0.1 \text{ mV s}^{-1}$ .

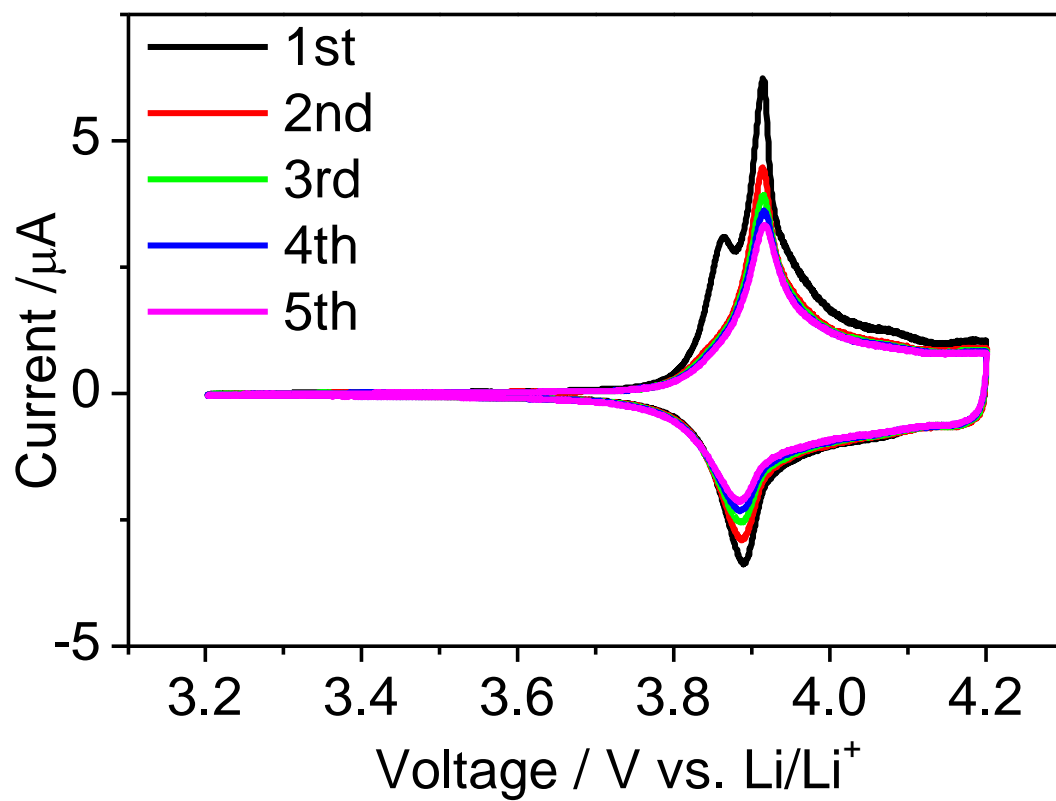

**Figure S3.** Cyclic voltammograms of the LiCoO<sub>2</sub> film/NbO<sub>2</sub> film/LATP glass electrolyte assemble;  $\nu = 0.1 \text{ mV s}^{-1}$ .

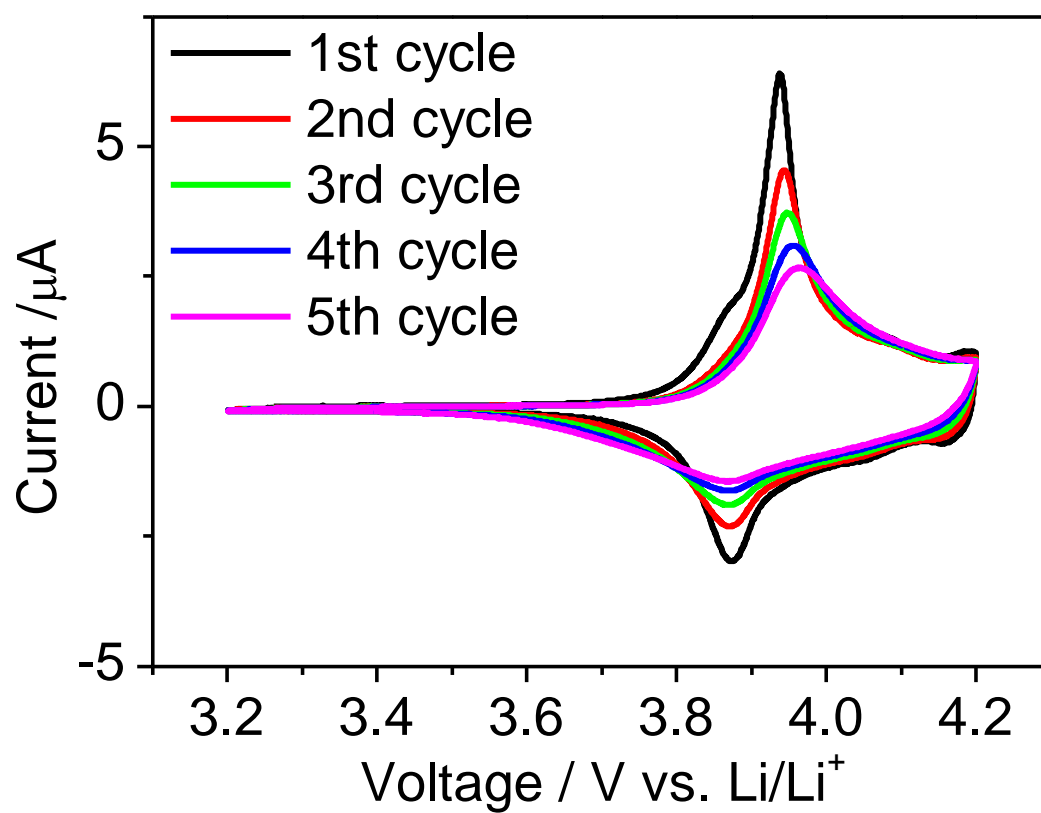

**Figure S4.** Cyclic voltammograms of the  $\text{LiCoO}_2$  film/ $\text{ZrO}_2$  film/LATP glass electrolyte assemble;  $\nu = 0.1 \text{ mV s}^{-1}$ .



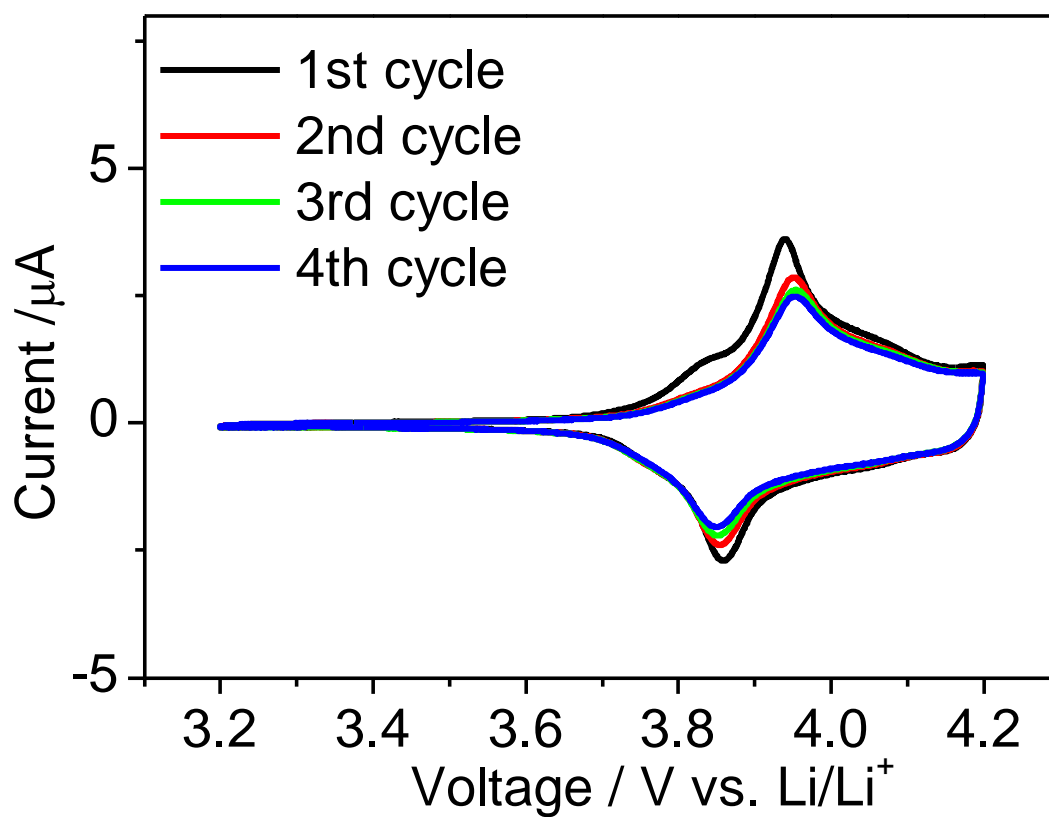

**Figure S5.** Cyclic voltammograms of the  $\text{LiCoO}_2$  film/ $\text{MoO}_2$  film/LATP glass electrolyte assemble;  $\nu = 0.1 \text{ mV s}^{-1}$ .

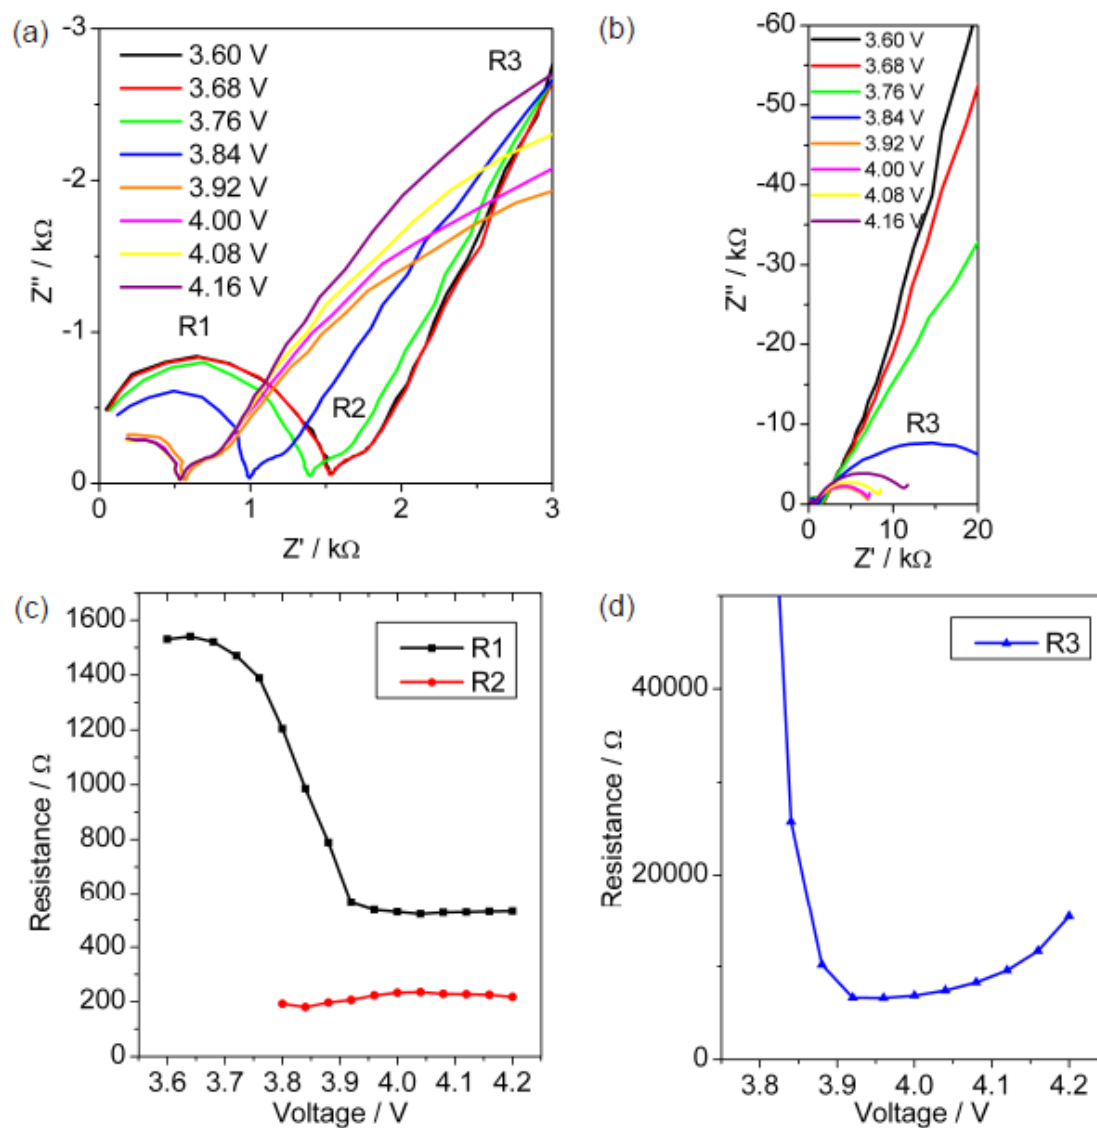

**Figure S6.** (a) and (b) The results from the electric impedance spectroscopy for LiCoO<sub>2</sub> film /LATP glass measured at various voltages. (c) and (d) Calculated resistance by using the equivalent circuit shown in Fig.4(a) as a function of voltages.

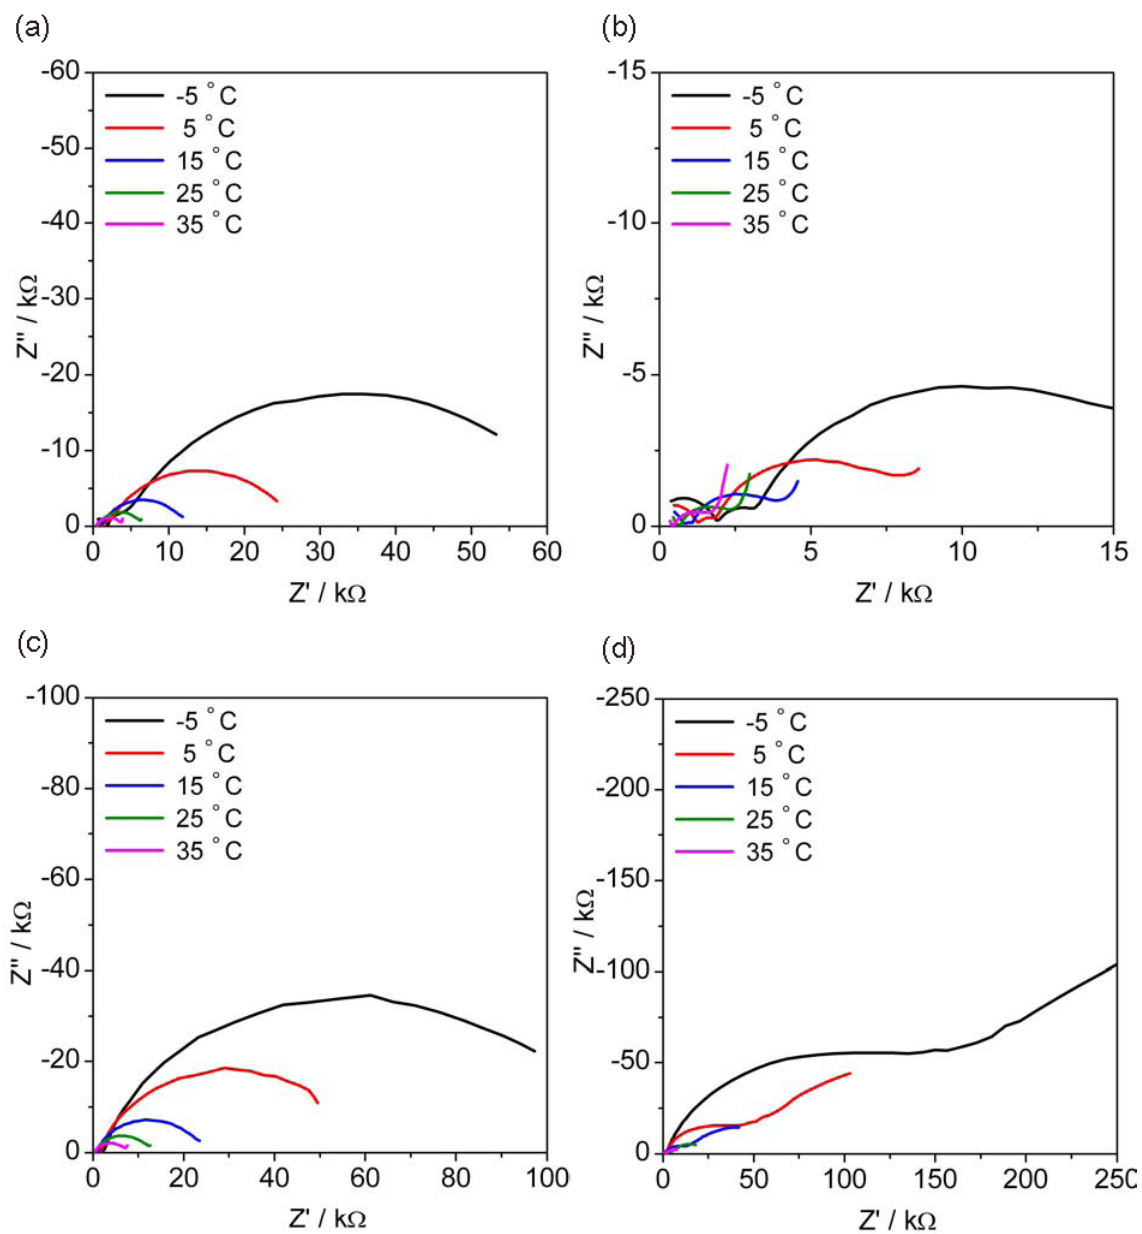

**Figure S7.** The results from the electric impedance spectroscopy for (a) LiCoO<sub>2</sub> film /LATP glass, (b) LiCoO<sub>2</sub> film/NbO<sub>2</sub> film/LATP glass, (c) LiCoO<sub>2</sub> film/ZrO<sub>2</sub> film/LATP glass, and (d) LiCoO<sub>2</sub> film/MoO<sub>2</sub> film/LATP glass measured at various temperatures (from -5 °C to 35 °C).

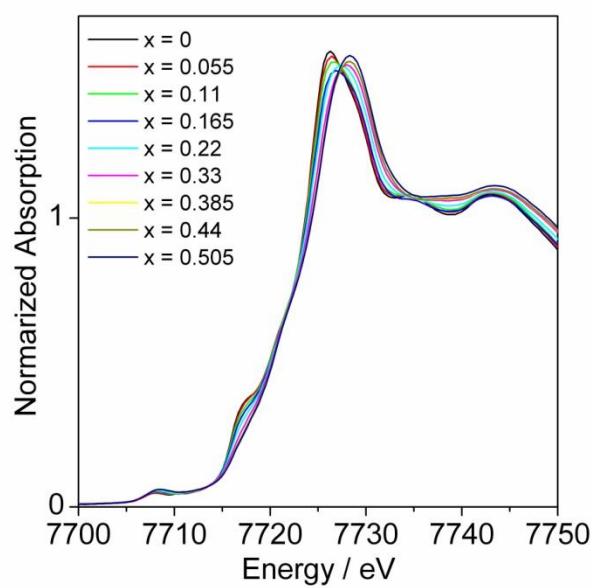

**Figure S8.** Co K-edge XANES spectra of  $\text{Li}_x\text{CoO}_2$ .

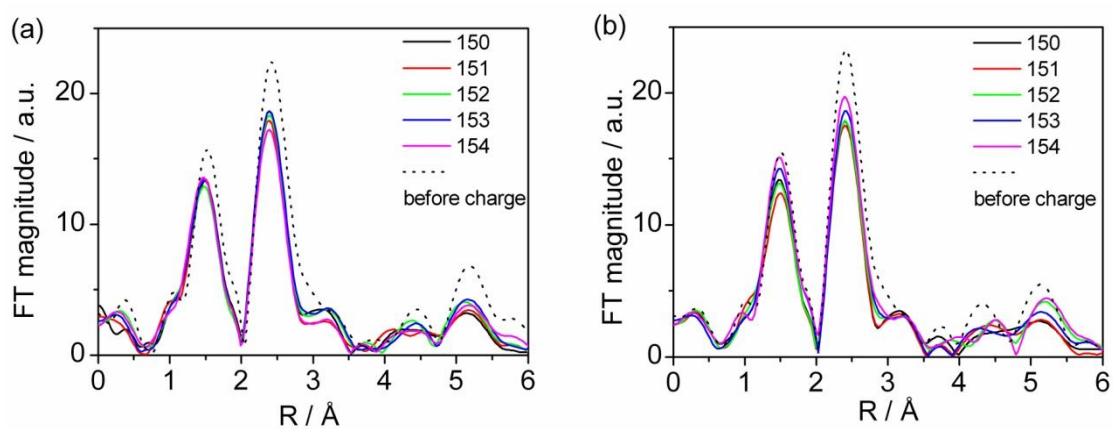

**Figure S9.** Fourier transforms (FTs) of the Co K-edge EXAFS oscillations for (a)  $\text{LiCoO}_2 / \text{LATP-GC}$  electrolyte and (b)  $\text{LiCoO}_2 / \text{NbO}_2 / \text{LATP-GC}$  electrolyte after charged at 3.92 V with each channel of PILATUS detector detecting around the interface. Dot line shows FT of same sample before charge.

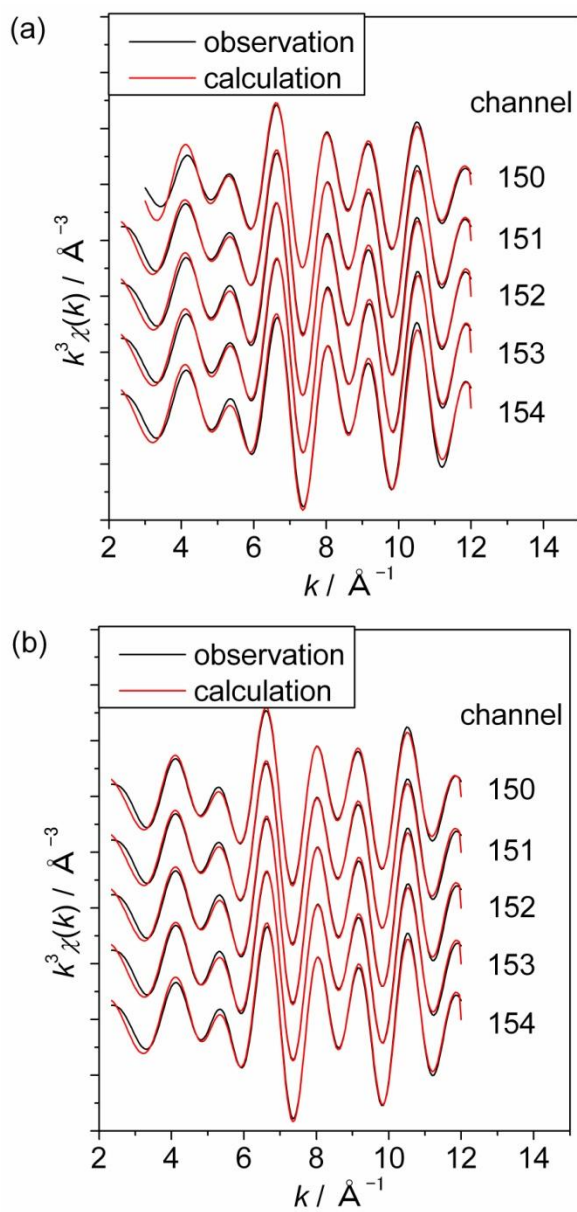

**Figure S10.** Experimental (black line) and calculated (red line) Fourier-filtered  $k^3$ -weighted Co K-edge EXAFS oscillations for various PILATUS channel of (a)  $\text{LiCoO}_2$ /LATP-GC electrolyte and (b)  $\text{LiCoO}_2$ / $\text{NbO}_2$ /LATP-GC electrolyte.

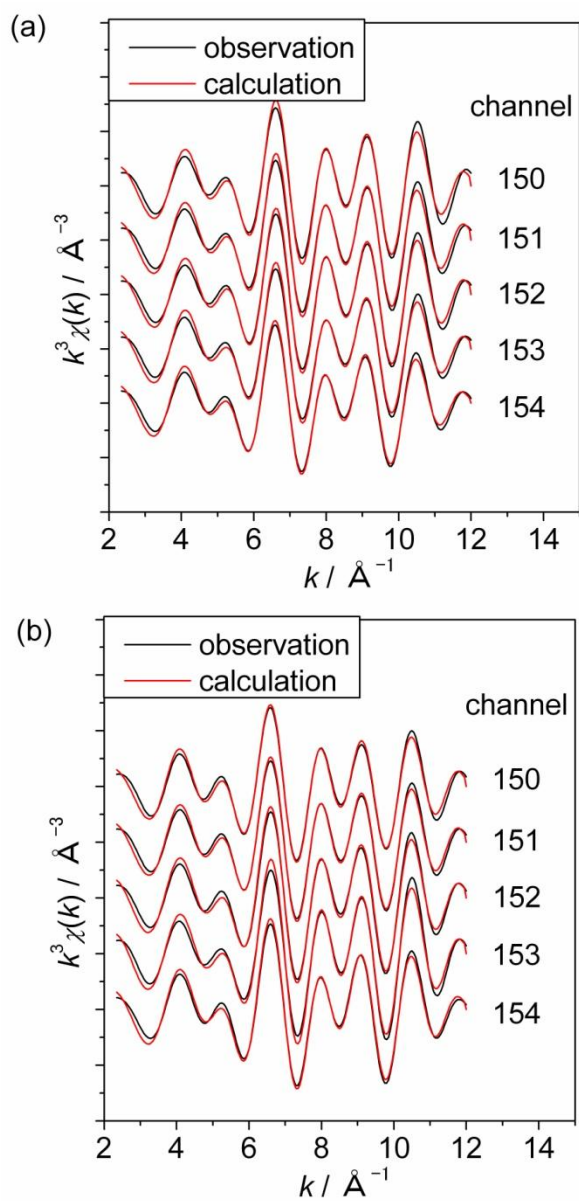

**Figure S11.** Experimental (black line) and calculated (red line) Fourier-filtered  $k^3$ -weighted Co K-edge EXAFS oscillations for various PILATUS channel of (a)  $\text{LiCoO}_2$ /LATP-GC electrolyte and (b)  $\text{LiCoO}_2$ / $\text{NbO}_2$ /LATP-GC electrolyte after charged at 3.92 V.

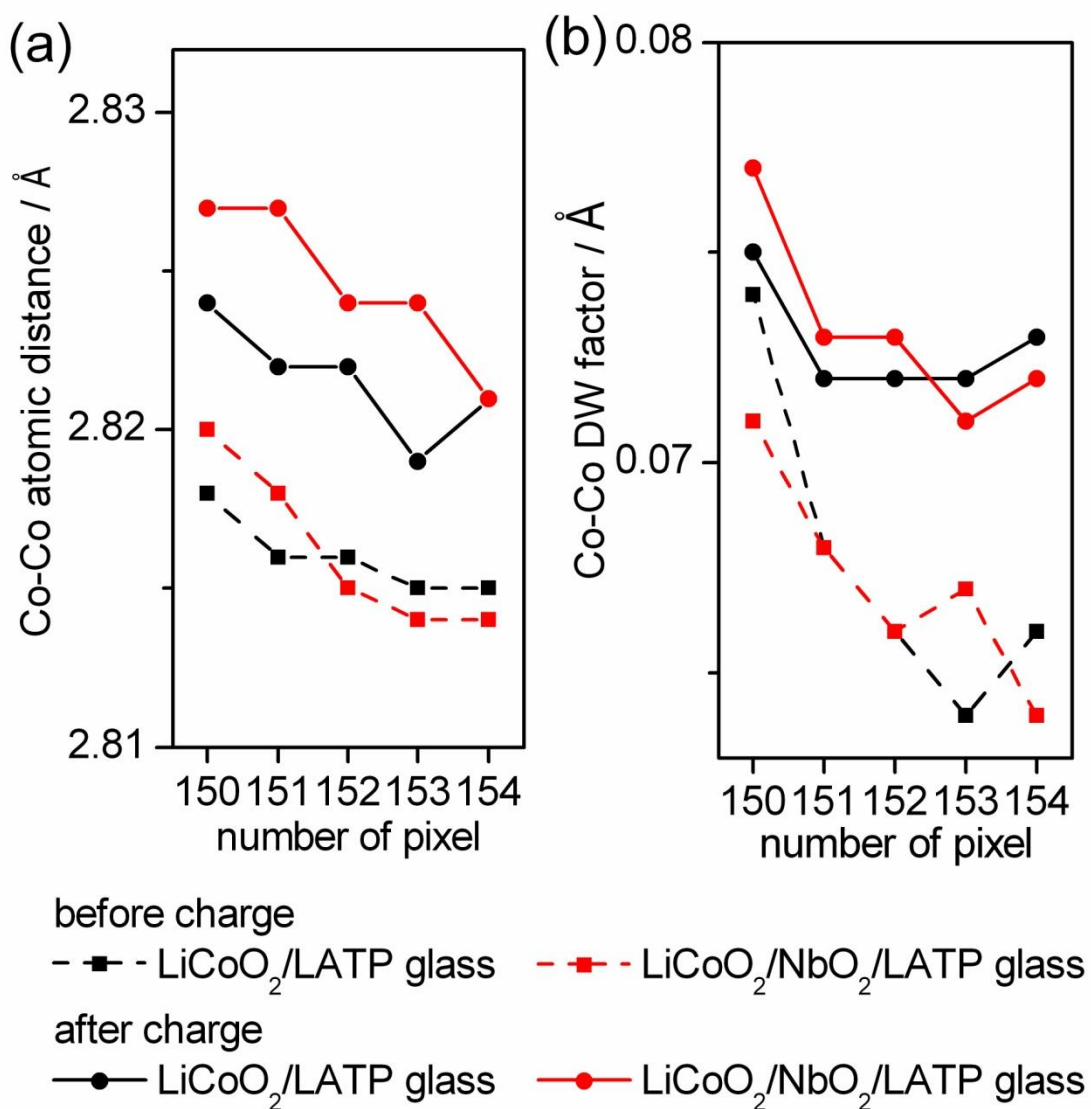

**Figure S12.** (a) Co-Co interatomic distance and (b) CoCo Debye-Waller factor for LiCoO<sub>2</sub>/LATP-GC electrolyte and LiCoO<sub>2</sub>/NbO<sub>2</sub>/LATP-GC electrolyte observed at various PILATUS channels. Solid and dot lines show the parameters for after and before charge, respectively.
